# Supplementary material for: Isolated Terminal Ileitis- Crohn’s Disease or Something Else?
Source: Preprints.org preprint supplement (doi:10.20944/preprints202401.1812.v1), 2024-01-25
Supplement: Supplementary file 1 [file supplementary]

## Sheet: coded sheet
MRN	Age	Gender(M/F)	Terminal ileitis(y/n)	Crohns disease(y/n)	Ulcerative colitis(y/N)	0ther etiology	Stool culture positive (y/n)	Bacteria in stool culture	C.diff positive(y/n)	CT scan showed Ileitis(y/n)	Colonoscopy(y/n)	Inpatient eval(y/n)	Outpatient eval(y/n)	biopsies (acute/chronic)	hospital stay(days)	Treatment(steroids,biologics,antibiotics)	Surgery(y/n)	Type of surgery	BMI
	40	2	1	1	2	3	3	3	3	3	1	2	1	2	0	1	2	1	19
	76	1	1	2	2	4	3	3	3	2	1	1	2	3	4	2	2	1	23
	37	2	1	2	2	3	2	2	2	3	1	2	1	1	0	1	2	1	45
	51	2	1	2	1	3	2	2	2	2	1	1	1	1	7	26	1	2	33
	59	1	1	1	2	3	2	2	2	1	1	1	1	1	5	5	1	3	29
	54	2	1	1	2	3	2	2	2	1	1	1	1	1	6	6	2	1	31
	64	1	1	1	2	3	2	2	2	1	1	2	1	1	0	5	2	1	40
	33	2	1	1	2	3	2	2	2	1	1	1	1	1	5	27	1	5	18
	31	2	1	2	2	2	2	2	2	3	1	2	1	1	0	1	2	1	30
	40	2	1	1	2	3	2	2	2	1	1	1	1	2	5	7	1	6	39
	23	2	1	2	2	2	3	3	3	3	1	2	1	1	0	1	2	1	24
	33	1	1	1	2	3	1	6	1	1	1	1	1	2	6	9	1	7	32
	37	2	1	2	2	3	2	2	3	3	1	2	1	1	0	1	2	1	23
	57	1	1	1	2	3	2	2	2	1	1	1	1	2	3	27	1	3	24
	62	1	1	1	2	3	2	2	2	3	1	2	1	2	0	9	1	3	24
	27	2	1	2	2	2	3	3	3	3	1	2	1	1	0	1	2	1	25
	31	1	1	2	2	2	3	3	3	3	1	2	1	1	0	1	2	1	29
	62	2	1	1	2	3	2	2	2	3	1	2	1	1	0	1	2	1	32
	33	2	1	1	2	3	2	2	2	2	1	2	1	1	0	9	2	1	30
	45	2	1	1	2	3	3	3	3	1	1	1	1	1	18	9	1	3	23
	28	2	1	2	2	3	3	3	3	3	1	2	1	1	0	1	2	1	NA
	32	2	1	1	2	3	2	2	2	2	1	1	1	2	3	3	1	6	35
	53	1	1	2	2	2	3	3	3	3	1	2	2	1	0	1	2	1	28
	24	2	1	1	2	3	3	3	3	3	1	2	1	1	0	10	2	1	24
	44	2	1	1	2	3	2	2	2	3	1	2	1	1	0	11	2	1	22
	52	1	1	1	2	3	1	5	2	1	1	1	1	1	3	3	1	11	22
	68	1	1	2	1	3	2	2	2	3	1	1	1	2	7	27	1	8	38
	71	1	1	2	2	3	2	2	2	2	1	2	2	2	0	1	2	1	51
	26	1	1	1	2	3	3	3	3	2	1	1	1	2	5	12	2	1	21
	64	1	1	2	2	2	3	3	3	3	1	2	2	1	0	1	2	1	39
	45	2	1	1	2	3	3	3	3	1	1	1	1	2	9	11	2	1	21
	47	1	1	2	1	3	3	3	2	2	1	1	1	1	7	2	1	8	26
	22	2	1	1	2	3	3	3	3	1	1	2	1	2	0	11	2	1	24
	36	1	1	2	2	2	2	2	2	2	1	1	1	1	3	1	2	1	21
	26	1	1	1	2	3	2	2	1	2	1	1	1	1	5	9	2	1	25
	33	2	1	2	2	2	2	2	3	3	1	2	1	1	0	1	2	1	38
	29	1	1	2	2	3	3	3	3	3	1	2	1	1	0	1	2	1	23
	62	1	1	2	2	2	3	3	3	3	1	2	2	1	0	1	2	1	31
	59	1	1	1	2	3	3	3	3	1	1	2	1	1	0	3	2	1	39
	53	1	1	1	2	3	3	3	3	3	1	2	2	2	0	1	1	9	31
	68	1	1	1	2	3	2	2	1	1	1	1	1	1	23	9	1	12	39
	30	1	1	1	2	3	3	3	3	3	1	2	1	2	0	5	2	1	26
	36	1	1	2	2	2	3	3	3	2	1	2	1	1	0	1	2	1	32
	71	2	1	2	2	5	3	3	3	3	1	2	1	1	0	1	2	1	28
	80	2	1	2	2	2	2	2	2	3	1	2	2	1	0	1	2	1	24
	58	2	1	1	2	3	2	2	1	2	1	2	1	1	0	3	1	3	39
	82	2	1	2	2	6	2	2	2	2	1	1	1	1	7	1	1	2	23
	41	2	1	2	2	2	3	3	3	2	1	2	1	1	0	1	2	1	22
	38	1	1	1	2	3	2	2	2	2	1	2	1	1	0	5	2	1	30
	67	2	1	2	2	2	2	2	2	2	1	2	1	1	0	1	2	1	24
	64	2	1	1	2	3	3	3	3	2	1	2	1	2	0	5	2	1	40
	36	2	1	1	2	3	3	3	3	1	1	1	1	2	5	4	1	3	21
	37	2	1	1	2	3	3	3	3	1	1	1	2	1	6	13	2	1	20
	22	2	1	2	1	3	3	3	3	3	1	2	1	1	0	1	2	1	36
	80	2	1	2	2	4	3	3	3	3	1	2	2	1	0	1	1	7	36
	64	2	1	2	2	6	2	2	1	2	1	1	1	4	6	1	2	1	27
	32	1	1	1	2	3	3	3	1	1	1	1	2	1	5	3	2	1	32
	34	2	1	1	2	3	2	2	1	3	1	2	1	1	0	1	2	1	32
	48	1	1	1	2	2	3	3	2	2	1	2	1	2	0	7	2	1	35
	75	1	1	2	2	1	3	3	2	2	1	1	2	5		2	1	10	21
	43	2	1	2	2	2	3	3	3	3	1	1	2	1	1	1	2	1	29
	40	1	1	2	2	3	3	3	3	3	1	2	1	1	0	1	2	1	24
	22	1	1	2	2	3	3	3	3	3	1	2	1	1	0	1	2	1	22
	35	1	1	1	2	3	2	2	2	2	1	1	1	1	7	3	1	10	23
	23	2	1	2	1	3	3	3	3	2	1	2	1	2	0	9	2	1	17
	23	1	1	2	2	6	3	3	3	1	1	2	1	1	0	1	2	1	NA
	48	2	1	2	2	3	3	3	3	2	1	2	1	1	0	1	2	1	21
	23	2	1	2	2	2	3	3	3	2	1	2	1	2	0	1	2	1	22
	73	1	1	1	2	3	3	3	3	1	1	2	1	2	0	5	1	7	26
	34	1	1	2	2	3	3	3	3	2	1	2	1	1	0	1	2	1	24
	41	1	1	1	2	3	3	3	3	1	1	2	1	1	0	5	1	3	30
	46	1	1	1	2	3	3	3	2	2	1	2	1	2	0	14	1	3	29
	38	2	1	2	1	3	3	3	3	3	1	2	1	1	0	11	2	1	23
	59	1	1	2	2	2	2	2	3	2	1	1	1	1	3	1	2	1	30
	64	1	1	2	2	3	3	3	3	3	1	2	2	1	0	1	2	1	28
	43	2	1	1	2	3	2	2	1	1	1	2	1	2	0	7	1	7	28
	45	1	1	1	2	3	2	2	2	1	1	1	1	2	4	9	1	3	24
	32	2	1	2	2	2	3	3	3	3	1	2	1	1	0	1	2	1	44
	26	1	1	2	2	3	3	3	3	2	1	1	2	1	4	1	2	1	34
	27	2	1	1	2	3	3	3	3	1	1	1	1	2	6	15	1	3	26
	31	2	1	1	2	3	2	2	2	2	1	1	1	2	3	16	1	10	26
	64	1	1	2	2	3	2	2	2	2	1	2	1	1	0	1	1	7	35
	44	2	1	1	2	3	2	2	2	2	1	2	1	1	0	1	1	6	25
	65	2	1	1	2	3	2	2	1	1	1	2	1	1	0	1	1	7	27
	59	1	1	1	2	3	2	2	2	3	1	2	1	1	0	3	2	1	30
	30	2	1	1	2	3	3	3	3	3	1	2	1	1	0	17	1	10	25
	49	2	1	2	2	3	3	3	3	3	1	2	1	1	0	1	2	1	24
	31	1	1	2	1	3	3	3	3	3	1	2	1	1	0	18	2	1	22
	27	2	1	2	2	6	3	3	3	1	1	2	1	1	0	1	2	1	27
	38	2	1	1	2	3	2	2	2	1	1	1	1	1	3	1	1	7	22
	28	2	1	2	2	3	3	3	3	3	1	2	1	1	0	1	2	1	28
	25	1	1	1	2	3	3	3	3	1	1	2	1	2	0	1	2	1	22
	26	2	1	2	1	3	3	3	3	3	1	2	1	1	0	18	2	1	40
	54	1	1	1	2	3	2	2	2	3	1	2	1	2	0	3	1	10	34
	45	2	1	1	2	3	2	2	2	1	1	2	1	2	0	7	2	1	34
	21	1	1	2	2	2	3	3	3	3	1	2	1	1	0	1	2	1	19
	35	2	1	2	2	2	3	3	3	3	1	2	1	1	0	1	2	1	38
	35	2	1	1	2	3	3	3	2	3	1	1	1	1	8	3	1	6	21
	29	2	1	1	2	3	2	2	2	1	1	2	1	1	0	7	2	1	28
	25	2	1	1	2	3	2	2	2	3	1	1	2	2	4	3	2	1	21
	23	2	1	2	2	2	3	3	3	3	1	2	1	1	0	1	2	1	20
	22	1	1	2	1	3	2	2	2	3	1	1	1	2	7	7	1	2	22
	26	1	1	2	2	2	3	3	3	3	1	2	1	2	0	1	2	1	29
	22	1	1	2	2	3	3	3	3	1	1	2	1	1	0	1	2	1	27
	64	1	1	2	2	2	3	3	3	2	1	2	1	1	0	1	1	7	34
	52	2	1	1	2	3	2	2	2	2	1	2	1	1	0	3	1	9	35
	37	1	1	2	2	2	2	2	2	3	1	2	1	1	0	1	2	1	31
	43	2	1	2	2	2	2	2	2	3	1	2	1	1	0	1	2	1	43
	60	2	1	1	2	3	2	2	3	3	1	1	1	1	3	15	2	1	26
	59	2	1	2	2	2	2	2	2	3	1	2	1	1	0	1	2	1	34
	63	1	1	2	2	3	3	3	3	2	1	2	1	1	0	1	2	1	35
	20	1	1	2	2	2	3	3	3	3	1	2	1	1	0	1	2	1	25
	37	1	1	1	2	3	2	2	2	2	1	1	1	2	3	19	1	3	27
	55	2	1	1	2	3	2	2	2	2	1	2	1	1	0	18	1	13	30
	66	1	1	2	2	2	3	3	3	3	1	2	1	1	0	1	2	1	30
	41	2	1	2	1	3	2	2	1	1	1	2	1	2	0	19	2	1	59
	11	2	1	1	2	3	2	2	2	3	1	2	1	1 + 2	0	6	2	1	18
	47	2	1	2	2	3	2	2	2	2	1	2	1	1	0	1	2	1	30
	53	1	1	1	2	6	3	3	3	3	1	2	2	1	0	1	2	1	34
	59	2	1	2	2	3	3	3	2	2	1	2	1	1	0	1	1	8	25
	69	1	1	2	2	3	3	3	3	2	1	2	1	1	0	1	1	1	20
	56	2	1	2	2	2	3	3	3	2	1	2	1	1	0	1	2	1	36
	35	1	1	1	2	3	2	2	2	3	1	2	1	1	0	3	2	1	50
	12	1	1	2	2	2	3	3	3	2	1	2	1	1	0	1	2	1	37
	28	2	1	2	2	2	2	2	2	3	1	2	1	1	0	1	2	1	22
	24	1	1	2	2	3	3	3	3	3	1	2	1	1	0	1	2	1	23
	50	1	1	2	2	3	3	3	3	3	1	2	2	1	0	1	2	1	39
	72	1	1	1	2	3	3	3	3	3	1	2	1	2	0	11	2	1	30
	33	2	1	2	2	3	3	3	3	3	1	2	2	1	0	1	2	1	44
	50	1	1	1	2	3	3	3	3	3	1	2	1	2	0	20	2	1	37
	70	2	1	1	2	3	3	3	3	1	1	2	1	1	0	11	2	1	25
	73	2	1	2	2	2	3	3	3	2	1	2	1	1	0	1	2	1	34
	63	2	1	1	2	3	3	3	3	1	1	2	1	2	0	7	2	1	24
	27	1	1	2	2	7	3	3	3	3	2	2	2	1	0	1	1	10	35
	12	1	1	2	2	3	3	3	3	3	1	1	2	1	2	1	2	1	15
	63	1	1	1	2	2	3	3	3	3	1	2	1	1	0	7	1	7	28
	53	2	1	2	2	2	3	3	3	3	1	2	2	1	0	1	2	1	36
	17	2	1	2	1	3	3	3	3	3	1	1	1	1	8	21	2	1	25
	62	2	1	1	2	3	3	3	3	1	1	2	1	1	0	15	2	1	46
	22	1	1	1	2	3	3	3	3	2	1	1	1	1	4	15	2	1	21
	37	2	1	1	2	2	3	3	3	3	1	2	1	1	0	1	2	1	24
	47	2	1	1	2	3	2	2	2	2	1	1	1	1	7	1	1	6	29
	53	2	1	1	2	3	1	4	2	3	1	2	1	1	0	3	1	14	37
	52	2	1	2	2	3	3	3	3	3	1	2	1	1	0	1	2	1	43
	66	1	1	2	2	2	3	3	3	3	1	1	2	1	3	1	1	7	33
	64	1	1	2	2	2	3	3	3	3	1	2	2	1	0	1	2	1	31
	44	1	1	2	2	2	3	3	3	3	1	2	2	1	0	1	2	1	28
	30	1	1	1	2	3	3	3	3	1	1	2	1	1	0	18	2	1	24
	29	1	1	2	2	3	3	3	3	3	1	2	1	1	0	1	2	1	42
	25	2	1	1	2	3	3	3	3	2	1	2	1	1	0	3	1	3	23
	59	1	1	2	2	3	2	2	2	3	1	2	2	1	0	1	2	1	32
	25	1	1	1	2	3	2	2	2	2	1	1	1	1	7	22	1	10	26
	30	2	1	1	2	3	2	2	2	1	1	2	1	1	0	15	2	1	43
	22	2	1	1	2	3	3	3	3	2	1	2	1	1	0	7	2	1	21
	72	1	1	2	2	3	3	3	3	2	1	2	1	1	0	1	2	1	22
	11	1	1	1	2	3	3	3	3	3	1	2	1	1	0	1	2	1	17
	40	1	1	2	2	3	3	3	3	1	1	2	1	2	0	23	2	1	28
	33	2	1	2	2	2	2	2	1	2	1	2	1	1	0	1	2	1	25
	60	1	1	2	2	3	2	2	2	3	1	2	2	1	0	1	2	1	25
	54	1	1	1	2	3	3	3	2	1	1	1	1	2	2	24	2	1	26
	20	1	1	2	1	3	3	3	3	3	1	2	1	1	0	25	2	1	23
	40	2	1	2	2	3	2	2	2	2	1	1	1	1	2	15	1	1	38
	28	1	1	1	2	3	2	2	2	1	1	2	1	1	0	13	2	1	28
	53	2	1	2	2	3	3	3	3	3	1	2	2	1	0	1	2	1	43
	77	2	1	2	2	3	3	3	3	3	1	2	2	1	0	1	2	1	40
	47	2	1	2	2	2	3	3	3	2	1	2	2	1	0	1	2	1	18
	53	2	1	1	2	3	2	2	2	1	1	1	1	1	8	9	1	1	23
	46	1	1	1	2	3	3	3	3	3	1	2	1	1	0	5	2	1	35
	70	2	1	2	2	2	3	3	3	3	1	2	1	1	0	1	2	1	27
	22	2	1	1	2	3	3	3	3	3	1	2	1	1	0	15	2	1	33
	28	1	1	1	2	3	2	2	3	3	1	2	1	1	0	11	2	1	25
	54	1	1	2	2	3	3	3	3	3	1	2	1	1	0	1	2	1	28
	71	2	1	2	2	2	2	2	2	2	1	2	2	1	0	1	2	1	38
	28	2	1	1	2	2	2	2	2	1	1	2	1	1	0	3	2	1	25
	59	2	1	2	2	3	3	3	3	3	1	2	1	1	0	1	2	1	30
	58	2	1	2	2	3	3	3	3	3	1	2	2	1	0	1	2	1	54
	27	1	1	1	2	2	3	3	3	3	1	1	1	2	6	3	1	10	21
	57	1	1	2	2	3	2	2	2	3	1	2	1	1	0	1	2	1	32
	19	1	1	1	2	3	2	2	2	3	1	2	1	1	0	5	1	1	19
	54	1	1	2	2	3	3	3	3	3	1	2	1	1	0	1	2	1	28
	36	2	1	2	2	3	3	3	3	2	2	2	2	1	0	1	2	1	29
	35	1	1	1	2	3	2	2	2	1	1	1	1	1	3	1	2	1	28
	63	2	1	2	2	2	3	3	3	3	1	2	1	1	0	1	2	1	33
	56	2	1	2	2	3	3	3	3	3	1	2	1	1	0	1	2	1	23
	49	2	1	2	2	3	3	3	3	2	1	1	1	1	2	1	1	10	34
	18	1	1	1	2	3	3	3	3	3	1	2	1	1	0	9	2	1	18
	14	2	1	2	2	3	3	3	3	2	1	2	1	1	0	1	2	1	27
	26	2	1	2	2	2	1	4	2	2	1	1	1	1	4	1	2	1	26
	53	1	1	2	2	3	3	3	3	3	2	2	2	1	0	1	2	1	24
	41	2	1	1	2	3	3	3	3	3	2	2	2	1	0	1	1	1	NA
	74	1	1	2	2	3	3	3	3	3	1	2	1	1	0	1	2	1	NA
	41	2	1	2	2	3	3	3	3	1	1	2	1	1	0	1	2	1	33
	40	2	1	2	1	3	2	2	2	3	1	2	1	2	0	17	1	2	28
	22	1	1	2	2	2	2	2	2	3	1	2	1	1	0	1	2	1	21
	40	1	1	2	2	3	3	3	3	3	1	2	2	1	0	1	2	1	28
	36	1	1	2	2	2	3	3	3	3	1	2	2	1	0	1	2	1	34
	40	1	1	1	2	3	2	2	2	1	1	2	1	1	0	3	1	7	25
	45	1	1	1	2	3	3	3	2	1	1	1	2	1	5	7	2	1	18
	33	1	1	2	2	2	3	3	3	3	1	2	1	1	0	1	2	1	29
	42	1	1	2	2	3	3	3	3	3	1	2	1	1	0	1	2	1	38
	65	1	1	2	2	3	3	3	3	3	1	2	2	1	0	1	2	1	25
	57	1	1	2	2	2	3	3	3	3	1	2	1	1	0	1	2	1	29
	31	1	1	2	1	3	2	2	2	3	1	2	1	1	0	3	1	16	18
	54	2	1	2	2	2	2	2	2	3	1	2	1	1	0	1	2	1	34
	28	2	1	2	2	3	2	2	2	3	1	2	1	1	0	1	2	1	24
	18	2	1	2	2	3	3	3	3	3	1	2	1	1	0	1	2	1	29
	27	1	1	1	2	3	3	3	3	3	1	2	1	2	0	5	2	1	33
	69	1	1	2	2	2	3	3	3	3	1	2	1	1	0	1	2	1	30
	49	2	1	2	2	3	3	3	3	3	1	2	1	1	0	1	2	1	25
	47	2	1	2	2	3	3	3	3	3	1	2	1	1	0	1	2	1	41
	36	1	1	2	2	2	3	3	3	3	1	2	1	1	0	1	2	1	34
	16	1	1	1	2	3	2	2	2	2	1	2	1	1	0	23	2	1	29
	69	2	1	2	2	3	3	3	3	3	1	2	2	1	0	1	2	1	NA
	54	2	1	2	2	3	3	3	3	3	1	2	2	2	0	1	2	1	44
	62	1	1	2	2	2	3	3	3	3	1	2	1	1	0	1	2	1	NA
	26	2	1	2	2	2	3	3	3	3	1	2	1	1	0	1	2	1	23
	35	1	1	1	2	3	2	2	2	1	1	1	1	1	5	9	1	6	31
	63	2	1	1	2	3	2	2	2	2	1	2	1	2	0	11	1	15	34
	47	2	1	1	2	2	3	3	3	3	1	2	1	1	0	1	2	1	20
	84	1	1	2	2	2	3	3	2	2	1	2	1	1	0	1	2	1	23
	44	2	1	1	2	3	3	3	3	2	1	2	1	1	0	1	1	17	34
	43	1	1	2	2	3	3	3	3	2	1	2	1	1	0	1	2	1	32
	17	1	1	1	2	3	2	2	2	1	1	1	1	1	5	9	1	6	27
	50	2	1	2	2	3	3	3	3	3	1	2	1	1	0	1	2	1	52
	27	1	1	2	2	3	3	3	3	3	1	2	1	1	0	1	2	1	40
	54	1	1	2	2	2	3	3	3	3	1	2	1	1	0	1	2	1	21
	43	2	1	1	2	3	3	3	3	3	1	2	1	1	0	1	2	1	26
	49	2	1	1	2	3	2	2	2	2	1	2	1	1	4	1	1	10	20
	59	1	1	1	2	2	2	2	2	3	1	2	1	1	0	1	2	1	31
	43.7555																		29.16	Mean

## Sheet: master data sheet
MRN	Age	Gender(M/F)	Terminal ileitis(y/n)	Crohns disease(y/n)	Ulcerative colitis(y/N)	0ther etiology	Stool culture positive (y/n)	Bacteria in stool culture	C.diff positive(y/n)	CT scan showed Ileitis(y/n)	Colonoscopy(y/n)	Inpatient eval(y/n)	Outpatient eval(y/n)	biopsies (acute/chronic)	hospital stay(days)	Treatment(steroids,biologics,antibiotics)	Surgery(y/n)	Type of surgery	BMI
	40	F	y	y	N	N	NA	NA	NA	NA	Y	N	Y	chronic ileitis	0	None (prescribed but not taken)	N	None	19
	76	M	y	N	N	PVD	NA	NA	NA	N	Y	Y	N	ischemic ileitis	4	Antibiotics (meropenem)	N	None	23
	37	F	y	N	N	NO*	N	N	N	NA	Y	N	Y	focal mild active ileitis	0	None	N	None	45
	51	F	y	N	Y	N	N	N	N	N	Y	Y	Y	active ileitis	7	Biologics (Humira) and antibiotics (flagyl)	y	IPAA	33
	59	M	y	Y	N	N	N	N	N	Y	Y	Y	Y	active ileitis	5	Imuran	Y	ileocecectomy	29
	54	F	y	y	n	n	n	n	n	y	y	y	y	patchy active ileitis	6	Steroids and biologics	N	None	31
	64	M	y	y	n	n	n	n	n	y	y	n	y	patchy active ileitis	0	Imuran	n	None	40
	33	F	y	y	n	n	n	n	n	y	y	y	y	active ileitis	5	Biologics (Remicade) and steroids	y	ileocecectomy with enterovesicular fistula removal	18
	31	F	y	n	n	NSAID induced?	n	n	n	NA	y	n	y	focal mild active ileitis	0	None	n	None	30
	40	F	y	y	n	n	n	n	n	y	y	y	y	chronic ileitis	5	Steroids	y	ileocolonic resection	39
	23	F	y	n	n	NSAID induced?	NA	NA	NA	NA	y	n	y	focal active ileitis	0	None	n	none	24
	33	M	y	y	n	n	y	EPEC and EAEC	y	y	y	y	y	chronic active ileitis	6	Biologics (multiple)	y	right hemivolectomy	32
	37	F	y	n	n	n	n	n	NA	NA	y	n	y	patchy active ileitis	0	none	n	None	23
	57	M	y	y	n	n	n	n	n	y	y	y	y	chronic active ileitis	3	Steroids (budesonide) and biologics (Remicade)	y	ileocecal cecectomy	24
	62	M	y	y	n	n	n	n	n	NA	y	n	y	chronic ileitis	0	Biologics	y	ileocolectomy	24
	27	F	y	n	n	Drug induced	NA	NA	NA	NA	y	n	y	mild active ileitis	0	None	n	None	25
	31	M	y	n	n	Drug induced	NA	NA	NA	NA	y	n	y	mild active ileitis	0	none	n	None	29
	62	F	y	y	n	n	n	n	n	NA	y	n	y	mild active ileitis	0	None	n	None	32
	33	F	y	y	n	n	n	n	n	n	y	n	y	focal active ileitis	0	Biologics	n	None	30
	45	F	y	y	n	n	NA	NA	NA	y	y	y	y	focal acute ileitis	18	Biologics (Remicade)	y	ileocecectomy	23
	28	F	y	n	n	n	NA	NA	NA	NA	y	n	y	mild active ileitis	0	None	n	None	NA
	32	F	y	y	n	n	n	n	n	n	y	y	y	chronic ileitis	3	Biologics (Humira)	y	ileocolonic resection	35
	53	M	y	n	n	Possible drug induced	NA	NA	NA	NA	y	n	n	mild active ileitis	0	None	n	None	28
	24	F	y	y	n	n	NA	NA	NA	NA	y	n	y	active ileitis	0	Biologics (Humira) and steroids	n	None	24
	44	F	y	y	n	n	n	n	n	NA	y	n	y	focal active ileitis	0	Mesalamine	n	None	22
	52	M	y	y	n	n	y	Cryptosporidium	n	y	y	y	y	acute ileitis	3	Biologics (Humira)	y	ileocecectomy with appendectomy	22
	68	M	y	n	y	n	n	n	n	NA	y	y	y	chronic ileitis/backwash ileitis	7	Biologics (Remicade) and Steroids	y	pancolectomy	38
	71	M	y	n	n	unknown	n	n	n	n	y	n	n	chronic ileitis	0	none	n	None	51
	26	M	y	y	n	n	NA	NA	NA	n	y	y	y	chronic ileitis	5	Mesalamine and Biologics	n	None	21
	64	M	y	n	n	Drug induced	NA	NA	NA	NA	y	n	n	mild active ileitis	0	None	n	None	39
	45	F	y	y	n	n	NA	NA	NA	y	y	y	y	chronic ileitis	9	Mesalamine (biologics and steroids in the past)	n	None	21
	47	M	y	n	y	n	NA	NA	n	n	y	y	y	mild active ileitis	7	Antibiotics (flagyl)	y	total colectomy	26
	22	F	y	y	n	n	NA	NA	NA	y	y	n	y	chronic ileitis	0	Mesalamine	n	none	24
	36	M	y	n	n	Drug induced	n	n	n	n	y	y	y	focal active ileitis	3	none	n	None	21
	26	M	y	y	n	n	n	n	y	n	y	y	y	patchy active ileitis	5	Biologics (Remicade)	n	None	25
	33	F	y	n	n	Drug induced	n	n	NA	NA	y	n	y	focal active ileitis	0	None	n	None	38
	29	M	y	n	n	unknown	NA	NA	NA	NA	y	n	y	focal active ileitis	0	None	n	None	23
	62	M	y	n	n	Drug induced	NA	NA	NA	NA	y	n	n	mild active ileitis	0	none	n	None	31
	59	M	y	y	n	n	NA	NA	NA	y	y	n	y	active ileitis	0	Biologics (Humira)	n	none	39
	53	M	y	y	n	n	NA	NA	NA	NA	y	n	n	chronic ileitis	0	none	y	right hemicolectomy and ileostomy	31
	68	M	y	y	n	n	n	n	y	y	y	y	y	patchy active ileitis	23	Biologics (Remicade)	y	subtotal colectomy with end ileostomy	39
	30	M	y	y	n	n	NA	NA	NA	NA	y	n	y	chronic ileitis	0	Biologics (Imuran)	n	None	26
	36	M	y	n	n	Drug induced	NA	NA	NA	n	y	n	y	active ileitis	0	none	n	None	32
	71	F	y	n	n	?nsaids/lansoprazole	NA	NA	NA	NA	y	n	y	active ileitis	0	none	n	None	28
	80	F	y	n	n	Drug induced	n	n	n	NA	y	n	n	active ileitis	0	none	n	None	24
	58	F	y	y	n	n	n	n	y	n	y	n	y	mild patchy ileitis	0	Biologics (Humira)	y	anastomotic site biopy and ileocecectomy	39
	82	F	y	n	n	infective colitis vs drug injury	n	n	n	n	y	y	y	focal active ileitis	7	none	y	subtotal colectomy with ileo-anal anastamosis	23
	41	F	y	n	n	Drug induced	NA	NA	NA	n	y	n	y	active ileitis	0	none	n	None	22
	38	M	y	y	n	n	n	n	n	n	y	n	y	active ileitis	0	Biologics (Imuran)	n	none	30
	67	F	y	n	n	NSAID induced?	n	n	n	n	y	n	y	active ileitis	0	none	n	None	24
	64	F	y	y	n	n	NA	NA	NA	n	y	n	y	chronic ileitis	0	Biologics (Imuran)	n	None	40
	36	F	y	y	n	n	NA	NA	NA	y	y	y	y	chronic ileitis	5	Steroids and antibiotics (flagyl)	y	ileocecectomy	21
	37	F	y	y	n	n	NA	NA	NA	y	y	y	n	active ileitis	6	Biologics (Cimzia)	n	None	20
	22	F	y	n	y	n	NA	NA	NA	NA	y	n	y	active ileitis	0	none	n	None	36
	80	F	y	n	n	ischemic/nsaids	NA	NA	NA	NA	y	n	n	active ileitis	0	none	Y	Right hemicolectomy (for colon cancer)	36
	64	F	y	n	n	infectious vs ischemic	n	n	y	n	y	y	y	active and lymphocytic ileitis	6	none	n	None	27
	32	M	y	y	n	n	NA	NA	y	y	y	y	n	active ileitis	5	Biologics (Humira)	n	none	32
	34	F	y	y	n	n	n	n	y	NA	y	n	y	active ileitis	0	None (currently- multiple biologics in past)	n	None	32
	48	M	y	y	n	Possible drug induced	NA	NA	NA	n	y	n	y	chronic ileitis	0	Steroids	n	None	35
	75	M	y	n	n	TB	NA	NA	NA	n	y	y	n	granulomatous ileitis ,AFB mycobacteria present		antibiotics	y	Small bowel resection	21
	43	F	y	n	n	Possible drug induced	NA	NA	NA	NA	y	y	n	active ileitis	1	none	n	none	29
	40	M	y	n	n	No specific leading etiology	NA	NA	NA	NA	y	n	y	active ileitis	0	none	n	None	24
	22	M	y	n	n	No specific leading etiology	NA	NA	NA	NA	y	n	y	active ileitis	0	None	n	None	22
	35	M	y	y	n	n	n	n	n	n	y	y	y	active ileitis	7	Biologics (Humira)	y	Small bowel resection	23
	23	F	y	n	y	n	NA	NA	NA	n	y	n	y	chronic ileitis	0	Biologics (Remicade)	n	None	17
	23	M	y	n	n	Likely infectious	NA	NA	NA	y	y	n	y	active ileitis	0	None	n	None	NA
	48	F	y	n	n	No specific leading etiology	NA	NA	NA	n	y	n	y	active ileitis	0	none	n	None	21
	23	F	y	n	n	NSAID induced?	NA	NA	NA	n	y	n	y	chronic ileitis	0	none	n	None	22
	73	M	y	y	n	n	NA	NA	NA	y	y	n		chronic ileitis	0	Biologics (Imuran)	y	right hemicolectomy and ileocecectomy	26
	34	M	y	n	n	No specific leading etiology	NA	NA	NA	n	y	n	y	active ileitis	0	none	n	None	24
	41	M	y	y	n	n	NA	NA	NA	y	y	n	y	active ileitis	0	Biologics (Imuran)	y	ileocecectomy	30
	46	M	y	y	n	n	NA	NA	n	n	y	n	y	chronic ileitis	0	Biologics (Entyvio) and antiobiotics (cipro/flagyl)	y	ileocecectomy	29
	38	F	y	n	y	n	NA	NA	NA	NA	y	n	y	mild ileitis	0	Mesalamine	n	None	23
	59	M	y	n	n	Drug induced	n	n	NA	n	y	y	y	active ileitis	3	none	n	None	30
	64	M	y	n	n	No specific leading etiology	NA	NA	NA	NA	y	n	n	active ileitis	0	none	n	None	28
	43	F	y	y	n	n	n	n	y	y	y	n	y	chronic ileitis	0	Steroids	y	right hemicolectomy and ileocecectomy	28
	45	M	y	y	n	n	n	n	n	y	y	y	y	chronic ileitis	4	Biologics (Remicade)	y	Colon and ileum resection	24
	32	F	y	n	n	NSAID induced?	NA	NA	NA	NA	y	n	y	acute ileitis	0	none	n	None	44
	26	M	y	n	n	No specific leading etiology	NA	NA	NA	n	y	y	n	active ileitis	4	none	n	None	34
	27	F	y	y	n	n	NA	NA	NA	y	y	y	y	chronic ileitis	6	Mesalamine and Steroids	y	ileocecectomy	26
	31	F	y	y	n	n	n	n	n	n	y	y	y	chronic ileitis	3	Biologics (Entyvio) and steroids	y	Small bowel resection	26
	64	M	y	n	n	None	n	n	n	n	y	n	y	active ileitis	0	none	y	right hemicolectomy with ileal resection	35
	44	F	y	y	n	n	n	n	n	n	y	n	y	active ileitis	0	none	y	Multiple- small and large bowel resections	25
	65	F	y	y	n	n	n	n	y	y	y	n	y	active ileitis	0	none currently (past Humira)	y	right hemicolectomy with ileal resection	27
	59	M	y	y	n	n	n	n	n	NA	y	n	y	mild active ileitis	0	Biologics (Humira)	n	none	30
	30	F	y	y	n	n	NA	NA	NA	NA	y	n	y	active ileitis	0	Biologics (Entyvio)	y	2 small bowel resections	25
	49	F	y	n	n	None	NA	NA	NA	NA	y	n	y	active ileitis	0	none	n	none	24
	31	M	y	n	y	n	NA	NA	NA	NA	y	n	y	active ileitis	0	Biologics (Humira and Imuran)	n	none	22
	27	F	y	n	n	Possible infection	NA	NA	NA	y	y	n	y	active ileitis	0	none	n	none	27
	38	F	y	y	n	n	n	n	n	y	y	y	y	active ileitis	3	none	y	Right hemicolectomy	22
	28	F	y	n	n	None	NA	NA	NA	NA	y	n	y	ileitis	0	none	n	none	28
	25	M	y	y	n	n	NA	NA	NA	y	y	n	y	chronic ileitis	0	none	n	none	22
	26	F	y	n	y	n	NA	NA	NA	NA	y	n	y	active ileitis	0	Biologics (Humira and Imuran)	n	none	40
	54	M	y	y	n	chronic changes related to colon-small bowel anastomosis	n	n	n	NA	y	n	y	chronic ileitis	0	Biologics (Humira)	y	Multiple- small and large bowel resections	34
	45	F	y	y	n	n	n	n	n	y	y	n	y	chronic ileitis	0	steroids	n	none	34
	21	M	y	n	n	NSAIDs	NA	NA	NA	NA	y	n	y	active ileitis	0	none	n	none	19
	35	F	y	n	n	Possible drug injury	NA	NA	NA	NA	y	n	y	active ileitis	0	none	n	none	38
	35	F	y	y	n	n	NA	NA	n	NA	y	y	y	patchy ileitis	8	Biologics (Humira)	y	ileocolonic resection	21
	29	F	y	y	n	n	n	n	n	y	y	n	y	active ileitis	0	Steroids	n	none	28
	25	F	y	y	n	n	n	n	n	NA	y	y	n	chronic ileitis	4	Biologics (Humira)	n	none	21
	23	F	y	n	n	Possible drug injury	NA	NA	NA	NA	y	n	y	active ileitis	0	none	n	none	20
	22	M	y	n	y	n	n	n	n	NA	y	y	y	chronic ileitis	7	steroids	y	IPAA	22
	26	M	y	n	n	Possible drug injury	NA	NA	NA	NA	y	n	y	chronic ileitis	0	none	n	none	29
	22	M	y	n	n	Unknown	NA	NA	NA	y	y	n	y	active ileitis	0	none	n	none	27
	64	M	y	n	n	NSAIDs	NA	NA	NA	n	y	n	y	active ileitis	0	none	y	right hemicolectomy	34
	52	F	y	y	n	n	n	n	n	n	y	n	y	active ileitis	0	Biologics (Humira)	y	colectomy with end ileostomy	35
	37	M	y	n	n	NSAIDs	n	n	n	NA	y	n	y	active ileitis	0	none	n	none	31
	43	F	y	n	n	NSAIDs	n	n	n	NA	y	n	y	active ileitis	0	none	n	none	43
	60	F	y	y	n	n	n	n	NA	NA	y	y	y	active ileitis	3	Mesalamine and steroid course	n	none	26
	59	F	y	n	n	Drug induced	n	n	n	NA	y	n	y	active ileitis	0	none	n	none	34
	63	M	y	n	n	Unknown	NA	NA	NA	n	y	n	y	active ileitis	0	none	n	none	35
	20	M	y	n	n	Drug induced	NA	NA	NA	NA	y	n	y	active ileitis	0	none	n	none	25
	37	M	y	y	n	n	n	n	n	n	y	y	y	chronic ileitis	3	steroids and sulfasalazine	y	ileocecectomy with ileocolonic anastamosis	27
	55	F	y	y	n	n	n	n	n	n	y	n	y	active ileitis	0	Biologics (Humira and Imuran)	y	colectomy with ileoanal anastamosis	30
	66	M	y	n	n	NSAIDs	NA	NA	NA	NA	y	n	y	active ileitis	0	None	n	none	30
	41	F	y	n	y	n	n	n	y	y	y	n	y	chronic active ileitis	0	Sulfasalazine and steroids	n	none	59
	11	F	y	y	n	n	n	n	n	NA	y	n	y	acute and chronic ileitis	0	Biologics (Remicade) and steroids	n	none	18
	47	F	y	n	n	Unknown	n	n	n	n	y	n	y	focal active ileitis	0	none	n	none	30
	53	M	y	y	n	Possible infection	NA	NA	NA	NA	y	n	n	active ileitis with granuloma	0	none	n	none	34
	59	F	y	n	n	Unknown	NA	NA	n	n	y	n	y	focal active ileitis	0	none	y	Total colectomy	25
	69	M	y	n	n	Unknown	NA	NA	NA	n	y	n	y	active ileitis	0	none	y	low anterior resection (for cancer dx)	20
	56	F	y	n	n	Drug induced	NA	NA	NA	n	y	n	y	active ileitis	0	none	n	none	36
	35	M	y	y	n	n	n	n	n	NA	y	n	y	active ileitis	0	Biologics (Humira)	n	none	50
	12	M	y	n	n	Possible drug injury	NA	NA	NA	n	y	n	y	focal acute ileitis	0	none	n	none	37
	28	F	y	n	n	Drug induced	n	n	n	NA	y	n	y	focal active ileitis	0	none	n	none	22
	24	M	y	n	n	Unknown	NA	NA	NA	NA	y	n	y	focal active ileitis	0	none	n	none	23
	50	M	y	n	n	Unknown	NA	NA	NA	NA	y	n	n	focal active ileitis	0	none	n	none	39
	72	M	y	y	n	n	NA	NA	NA	NA	y	n	y	chronic active ileitis	0	Mesalamine	n	none	30
	33	F	y	n- possible?	n	Unknown- possible Crohns	NA	NA	NA	NA	y	n	n	active ileitis	0	none	n	none	44
	50	M	y	y	n	n	NA	NA	NA	NA	y	n	y	chronic mildly active ileitis	0	Biologics (Imuran) and Mesalamine	n	none	37
	70	F	y	y	n	Unknown- possible Crohns	NA	NA	NA	y	y	n	y	active ileitis	0	Mesalamine	n	none	25
	73	F	y	n	n	Drug induced	NA	NA	NA	n	y	n	y	active ileitis	0	none	n	none	34
	63	F	y	y	n	n	NA	NA	NA	y	y	n	y	chronic active ileitis	0	steroids	n	none	24
	27	M	y	n	n	Meckel's?	NA	NA	NA	NA	n	n	n	acute ileitis meckels diverticulum	0	none	y	partial ilectomy	35
	12	M	y	n- possible?	n	Unknown- possible Crohns	NA	NA	NA	NA	y	y	n	active ileitis	2	none	n	none	15
	63	M	y	y	n	n	NA	NA	NA	NA	y	n	y	active ileitis	0	Steroids	y	Right hemicolectomy and multiple other resections	28
	53	F	y	n	n	Possible drug injury	NA	NA	NA	NA	y	n	n	active ileitis	0	none	n	none	36
	17	F	y	n	y	n	NA	NA	NA	NA	y	y	y	active ileitis	8	Antibiotics (Flagyl) and mesalamine	n	none	25
	62	F	y	y	n	n	NA	NA	NA	y	y	n	y	active ileitis	0	Steroids and mesalamine	n	none	46
	22	M	y	y	n	n	NA	NA	NA	n	y	y	y	active ileitis	4	Steroids and mesalamine	n	none	21
	37	F	y	y- possible	n	Possible drug injury	NA	NA	NA	NA	y	n	y	active ileitis	0	none	n	none	24
	47	F	y	y	n	n	n	n	n	n	y	y	y	active ileitis	7	none	y	ileocolonic resection	29
	53	F	y	y	n	n	y	Plesiomonas Shigelloides and Salmonella	n	NA	y	n	y	acute ileitis	0	Biologics (Humira)	y	proctocolectomy	37
	52	F	y	n	n	unknown	NA	NA	NA	NA	y	n	y	focal active ileitis	0	none	n	none	43
	66	M	y	n	n	Possible drug injury	NA	NA	NA	NA	y	y	n	active ileitis	3	none	y	right colectomy	33
	64	M	y	n	n	Possible drug injury	NA	NA	NA	NA	y	n	n	focal active ileitis	0	none	n	none	31
	44	M	y	n	n	Possible drug injury	NA	NA	NA	NA	y	n	n	active ileitis	0	none	n	none	28
	30	M	y	y	n	n	NA	NA	NA	y	y	n	y	chronic active ileitis	0	Biologics (Humira and Imuran)	n	none	24
	29	M	y	n	n	Unknown	NA	NA	NA	NA	y	n	y	chronic active ileitis	0	none	n	none	42
	25	F	y	y	n	n	NA	NA	NA	n	y	n	y	active ileitis	0	Biologics (Humira)	y	ileocecectomy	23
	59	M	y	n	n	unknown	n	n	n	NA	y	n	n	active ileitis	0	none	n	none	32
	25	M	y	y	n	n	n	n	n	n	y	y	y	active ileitis	7	Biologics (Imuran) and Steroids	y	Small bowel resection	26
	30	F	y	y	n	n	n	n	n	y	y	n	y	chronic active ileitis	0	Mesalamine and steroids	n	none	43
	22	F	y	y	n	n	NA	NA	NA	n	y	n	y	focal active ileitis	0	Steroids	n	none	21
	72	M	y	n	n	Unknown	NA	NA	NA	n	y	n	y	active ileitis	0	None	n	none	22
	11	M	y	y	n	n	NA	NA	NA	NA	y	n	y	active ileitis	0	none	n	none	17
	40	M	y	n	n	Indeterminate colitis (features of both IBD)	NA	NA	NA	y	y	n	y	chronic active ileitis	0	Biologics (Humira) and Mesalamine	n	none	28
	33	F	y	n	n	Possible drug injury	n	n	y	n	y	n	y	focal active ileitis	0	None	n	none	25
	60	M	y	n	n	unknown	n	n	n	NA	y	n	n	focal active ileitis	0	none	n	none	25
	54	M	y	y	n	n	NA	NA	n	y	y	y	y	chronic active ileitis	2	Biologics (Imuran) Steroids and Mesalamine	n	none	26
	20	M	y	n	y	n	NA	NA	NA	NA	y	n	y	focal mild active ileitis	0	Sulfasalazine	n	none	23
	40	F	y	n	n	unknown	n	n	n	n	y	y	y	focal active ileitis	2	Lialda and steroids (not currently though)	y	Sleeve gastrectomy	38
	28	M	y	y	n	n	n	n	n	y	y	n	y	acute ileitis	0	Biologics (Cimzia)			28
	53	F	y	n	n	Unknown	NA	NA	NA	NA	y	n	n	active ileitis	0	none	n	none	43
	77	F	y	n	n	Unknown	NA	NA	NA	NA	y	n	n	active ileitis	0	none	n	none	40
	47	F	y	n	n	Possible drug injury	NA	NA	NA	n	y	n	n	active ileitis	0	none	n	none	18
	53	F	y	y	n	n	n	n	n	y	y	y	y	active ileitis	8	Biologics (Remicade)	y	Ex lap	23
	46	M	y	y	n	n	NA	NA	NA	NA	y	n	y	active ileitis	0	Biologics (Imuran)	n	none	35
	70	F	y	n	n	NSAIDs	NA	NA	NA	NA	y	n	y	active ileitis	0	none	n	none	27
	22	F	y	y	n	n	NA	NA	NA	NA	y	n	y	active ileitis	0	Steroids and mesalamine	n	none	33
	28	M	y	y	n	n	n	n	NA	NA	y	n	y	focal active ileitis	0	Mesalamine	n	none	25
	54	M	y	n	n	unknown	NA	NA	NA	NA	y	n	y	active ileitis	0	none	n	none	28
	71	F	y	n	n	Possible drug injury	n	n	n	n	y	n	n	active ileitis	0	none	n	none	38
	28	F	y	y	n	n	n	n	n	y	y	n	y	active ileitis	0	Biologics (Humira)	n	none	25
	59	F	y	n	n	Unknown	NA	NA	NA	NA	y	n	y	active ileitis	0	none	n	none	30
	58	F	y	n	n	unknown	NA	NA	NA	NA	y	n	n	active ileitis	0	none	n	none	54
	27	M	y	y	n	n	NA	NA	NA	NA	y	y	y	chronic ileitis	6	Biologics (Humira)	y	resection of TI	21
	57	M	y	n	n	Unknown	n	n	n	NA	y	n	y	focal active ileitis	0	none	n	none	32
	19	M	y	y	n	n	n	n	n	NA	y	n	y	focal ileitis	0	Biologics (6-MP)	y	fistulotomy	19
	54	M	y	n	n	unknown	NA	NA	NA	NA	y	n	y	active ileitis	0	none	n	none	28
	36	F	y	n	n	unknown	NA	NA	NA	n	n	n	n	active ileitis	0	none	n	none	29
	35	M	y	y	n	n	n	n	n	y	y	y	y	active ileitis	3	none currently	n	none	28
	63	F	y	n	n	NSAIDs	NA	NA	NA	NA	y	n	y	active ileitis	0	none	n	none	33
	56	F	y	n	n	unknown	NA	NA	NA	NA	y	n	y	active ileitis	0	none	n	none	23
	49	F	y	n	n	unknown	NA	NA	NA	n	y	y	y	active ileitis	2	none	y	Small bowel resection with anastamosis	34
	18	M	y	y	n	n	NA	NA	NA	NA	y	n	y	active ileitis	0	Biologics (Remicade)	n	none	18
	14	F	y	n	n	unknown	NA	NA	NA	n	y	n	y	acute ileitis	0	none	n	none	27
	26	F	y	n	n	Possible drug injury	y	Plesiomonas Shigelloides and EPEC	n	n	y	y	y	Active ileitis	4	none	n	none	26
	53	M	y	n	n	unknown	NA	NA	NA	NA	n	n	n	active ileitis	0	none	n	none	24
	41	F	y	y	n	n	NA	NA	NA	NA	n	n	n	active ileitis	0	none	y	PEG tube	NA
	74	M	y	n	n	unknown	NA	NA	NA	NA	y	n	y	active ileitis	0	none	n	none	NA
	41	F	y	n	n	unknown	NA	NA	NA	y	y	n	y	active ileitis	0	none	n	none	33
	40	F	y	n	y	n	n	n	n	NA	y	n	y	chronic active ileitis	0	biologics (entyvio)	y	Proctocolectomy with ileal J pouch, IAPP	28
	22	M	y	n	n	Possible drug injury	n	n	n	NA	y	n	y	active ileitis	0	none	n	none	21
	40	M	y	n	n	unknown	NA	NA	NA	NA	n	n	n	active ileitis	0	none	n	none	28
	36	M	y	n	n	Possible drug injury	NA	NA	NA	NA	y	n	n	active ileitis	0	none	n	none	34
	40	M	y	y	n	n	n	n	n	y	y	n	y	active ileitis	0	Biologics (Humira)	y	right hemicolectomy	25
	45	M	y	y	n	n	NA	NA	n	y	y	y	n	active ileitis	5	Steroids (for flare)	n	none	18
	33	M	y	n	n	NSAIDs	NA	NA	NA	NA	y	n	y	active ileitis	0	none	n	none	29
	42	M	y	n	n	unknown	NA	NA	NA	NA	y	n	y	acute ileitis	0	none	n	none	38
	65	M	y	n	n	unknown	NA	NA	NA	NA	y	n	n	active ileitis	0	none	n	none	25
	57	M	y	n	n	Possible drug injury	NA	NA	NA	NA	y	n	y	active ileitis	0	none	n	none	29
	31	M	y	n	y	n	n	n	n	NA	y	n	y	active ileitis	0	Biologics (Humira)	y	Total colectomy and partial small bowel resection	18
	54	F	y	Possible	n	Possible drug injury	n	n	n	NA	y	n	y	active ileitis	0	none	n	none	34
	28	F	y	n	n	unknown	n	n	n	NA	y	n	y	focal active ileitis	0	none	n	none	24
	18	F	y	n	n	unknown	NA	NA	NA	NA	y	n	y	active ileitis	0	none	n	none	29
	27	M	y	y	n	n	NA	NA	NA	NA	y	n	y	chronic ileitis	0	Biologics (Imuran)	n	none	33
	69	M	y	n	n	Possible drug injury	NA	NA	NA	NA	y	n	y	active ileitis	0	none	n	none	30
	49	F	y	n	n	unknown	NA	NA	NA	NA	y	n	y	active ileitis	0	none	n	none	25
	47	F	y	n	n	unknown	NA	NA	NA	NA	y	n	y	active ileitis	0	none	n	none	41
	36	M	y	n	n	Possible drug injury	NA	NA	NA	NA	y	n	y	active ileitis	0	none	n	none	34
	16	M	y	y	n	n	n	n	n	n	y	n	y	active ileitis	0	Biologics (Humira) and Mesalamine	n	none	29
	69	F	y	n	n	unknown	NA	NA	NA	NA	y	n	n	active ileitis	0	none	n	none	NA
	54	F	y	n	n	unknown	NA	NA	NA	NA	y	n	n	chronic ileitis	0	none	n	none	44
	62	M	y	n	n	Possible drug injury	NA	NA	NA	NA	y	n	y	active ileitis	0	none	n	none	NA
	26	F	y	n	n	NSAIDs	NA	NA	NA	NA	y	n	y	acute ileitis	0	none	n	none	23
	35	M	y	y	n	n	n	n	n	y	y	y	y	acute ileitis	5	Biologics (Remicade)	y	ileocolonic resection	31
	63	F	y	y	n	n	n	n	n	n	y	n	y	chronic active ileitis	0	Mesalamine	y	segmental resection with colocolic anastomosis	34
	47	F	y	y- possible	n	Possible drug injury	NA	NA	NA	NA	y	n	y	active ileitis	0	none	n	none	20
	84	M	y	n	n	NSAIDs	NA	NA	n	n	y	n	y	active ileitis	0	none	n	none	23
	44	F	y	y	n	n	NA	NA	NA	n	y	n	y	active ileitis	0	none	y	ileum and ileocecal valve resection	34
	43	M	y	n	n	unknown	NA	NA	NA	n	y	n	y	active ileitis	0	none	n	none	32
	17	M	y	y	n	n	n	n	n	y	y	y	y	active ileitis	5	Biologics (Infliximab)	y	resection of TI, appendix, cecum	27
	50	F	y	n	n	unknown	NA	NA	NA	NA	y	n	y	active ileitis	0	none	n	none	52
	27	M	y	n	n	unknown	NA	NA	NA	NA	y	n	y	active ileitis	0	none	n	none	40
	54	M	y	n	n	Possible drug injury	NA	NA	NA	NA	y	n	y	active ileitis	0	none	n	none	21
	43	F	y	y	n	n	NA	NA	NA	NA	y	n	y	active ileitis	0	none	n	none	26
	49	F	y	y	n	n	n	n	n	n	y	y	y	active ileitis	4	none	y	small bowel resections	20
	59	M	y	y- possible	n	Possible drug injury	n	n	n	NA	y	n	y	active ileitis	0	none	n	none	31
